# Supplementary material
Source: publisher figshare collection journal article supplement (https://karger.figshare.com/articles/dataset/_/11282294)
Supplement: Supplementary file 1 [file 1]

Suppl. Figure 1, panel B

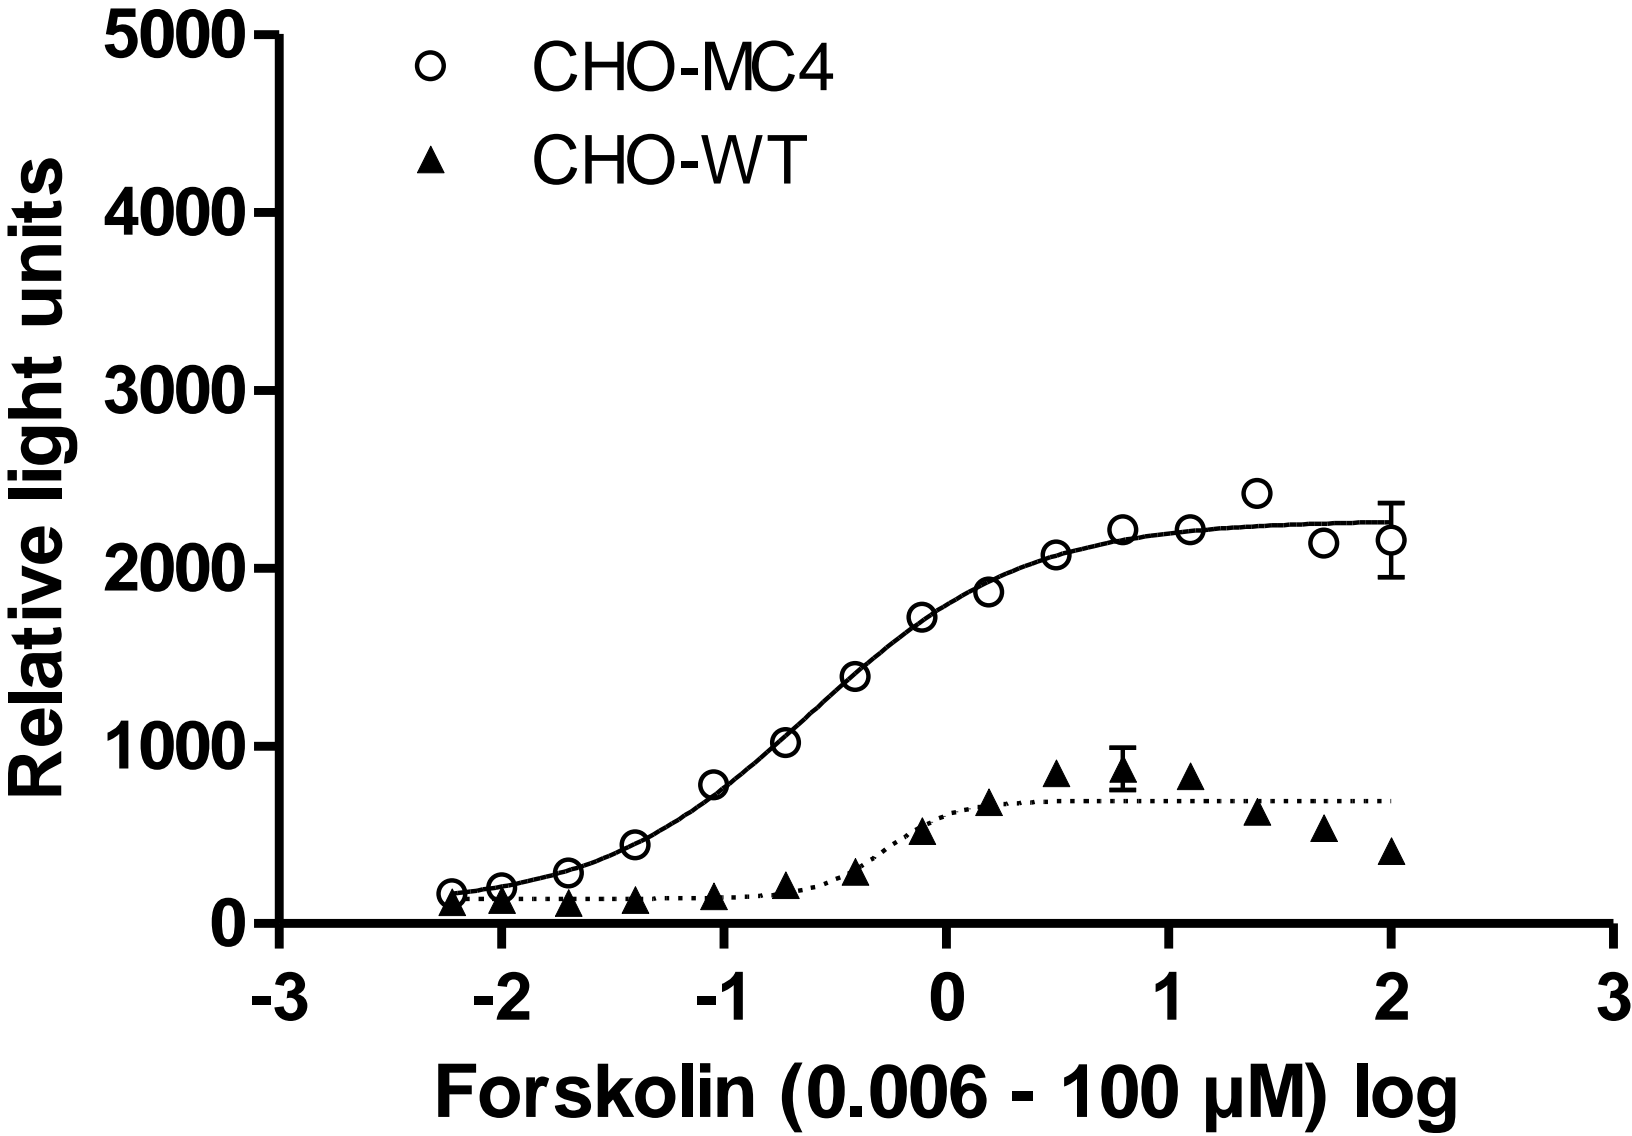

**Dose-response curve of forskolin in the CHO-MC4 and CHO-WT cells measured in the luciferase bioassay.** The forskolin concentrations (0.006 to 100  $\mu$ M) are shown in a logarithmic scale on the x-axis and the relative light unit (RLU) values are shown on the y-axis. The black outlined circles represent the data for the CHO-MC4 cells and the black triangles for the CHO-WT cells. The induction time was 3h. All forskolin concentrations were measured in duplicate and values are presented as mean  $\pm$  SEM.
