# Supplementary material
Source: publisher figshare collection journal article supplement (https://karger.figshare.com/articles/dataset/_/11282294)
Supplement: Supplementary file 3 [file 1]

Suppl. Figure 2, panel A

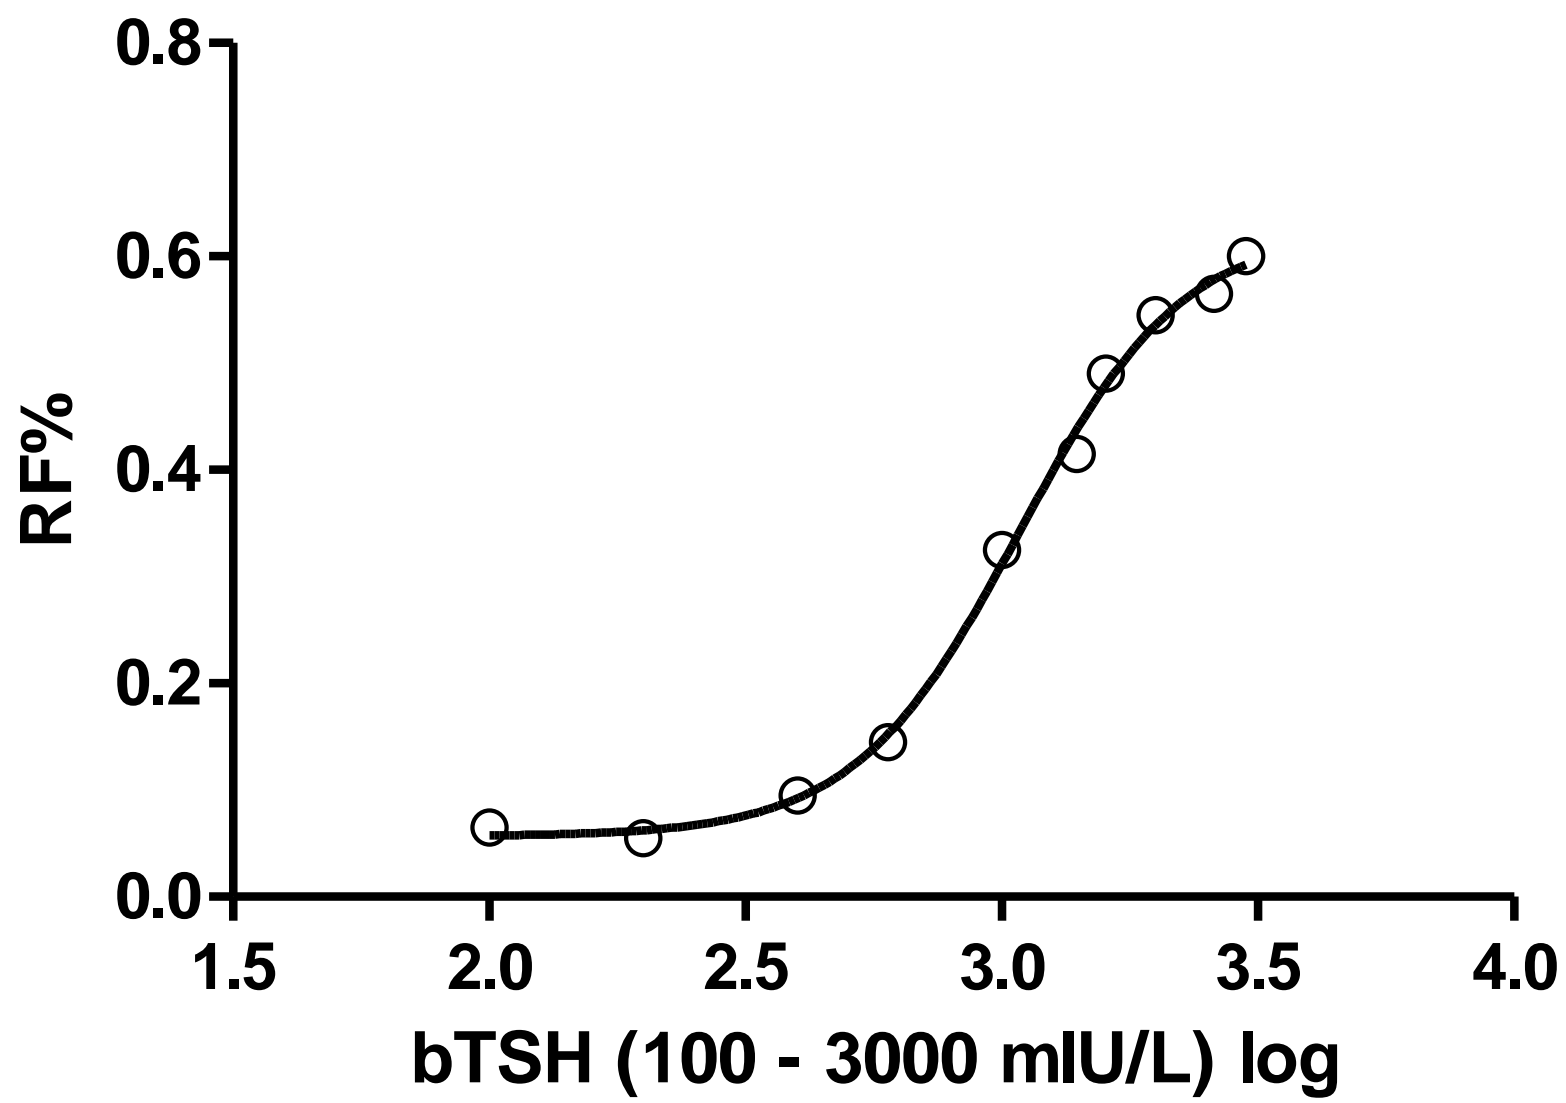

**Dose-response curve of bovine (b) TSH in CHO-MC4 cells measured in the cAMP assay.** The bTSH concentrations are represented in a logarithmic scale on the x-axis and the RF% is represented on the y-axis.
