# Supplementary material
Source: publisher figshare collection journal article supplement (https://karger.figshare.com/articles/dataset/_/11282294)
Supplement: Supplementary file 4 [file 1]

Archive with 4 entries (4 files):
- ETJ504509_sm1.pdf
- ETJ504509_sm2.pdf
- ETJ504509_sm3.pdf
- ETJ504509_sm4.pdf
